# Supplementary material for: N6-methyladenosine (m6A) reader Pho92 is recruited co-transcriptionally and couples translation to mRNA decay to promote meiotic fitness in yeast
Source: eLife journal article supplement (doi:10.7554/elife.84034), 2022-11-24

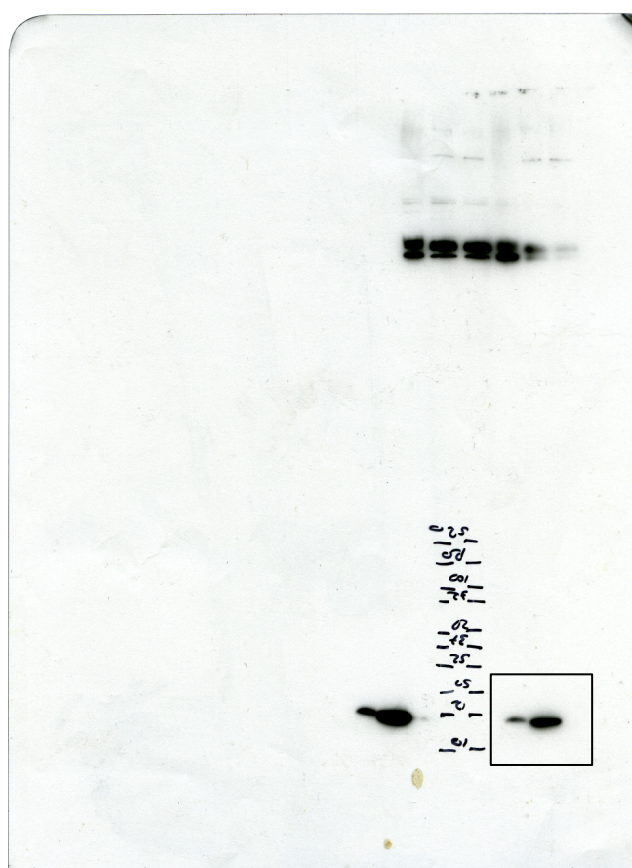

Figure 6 – figure supplement 1E

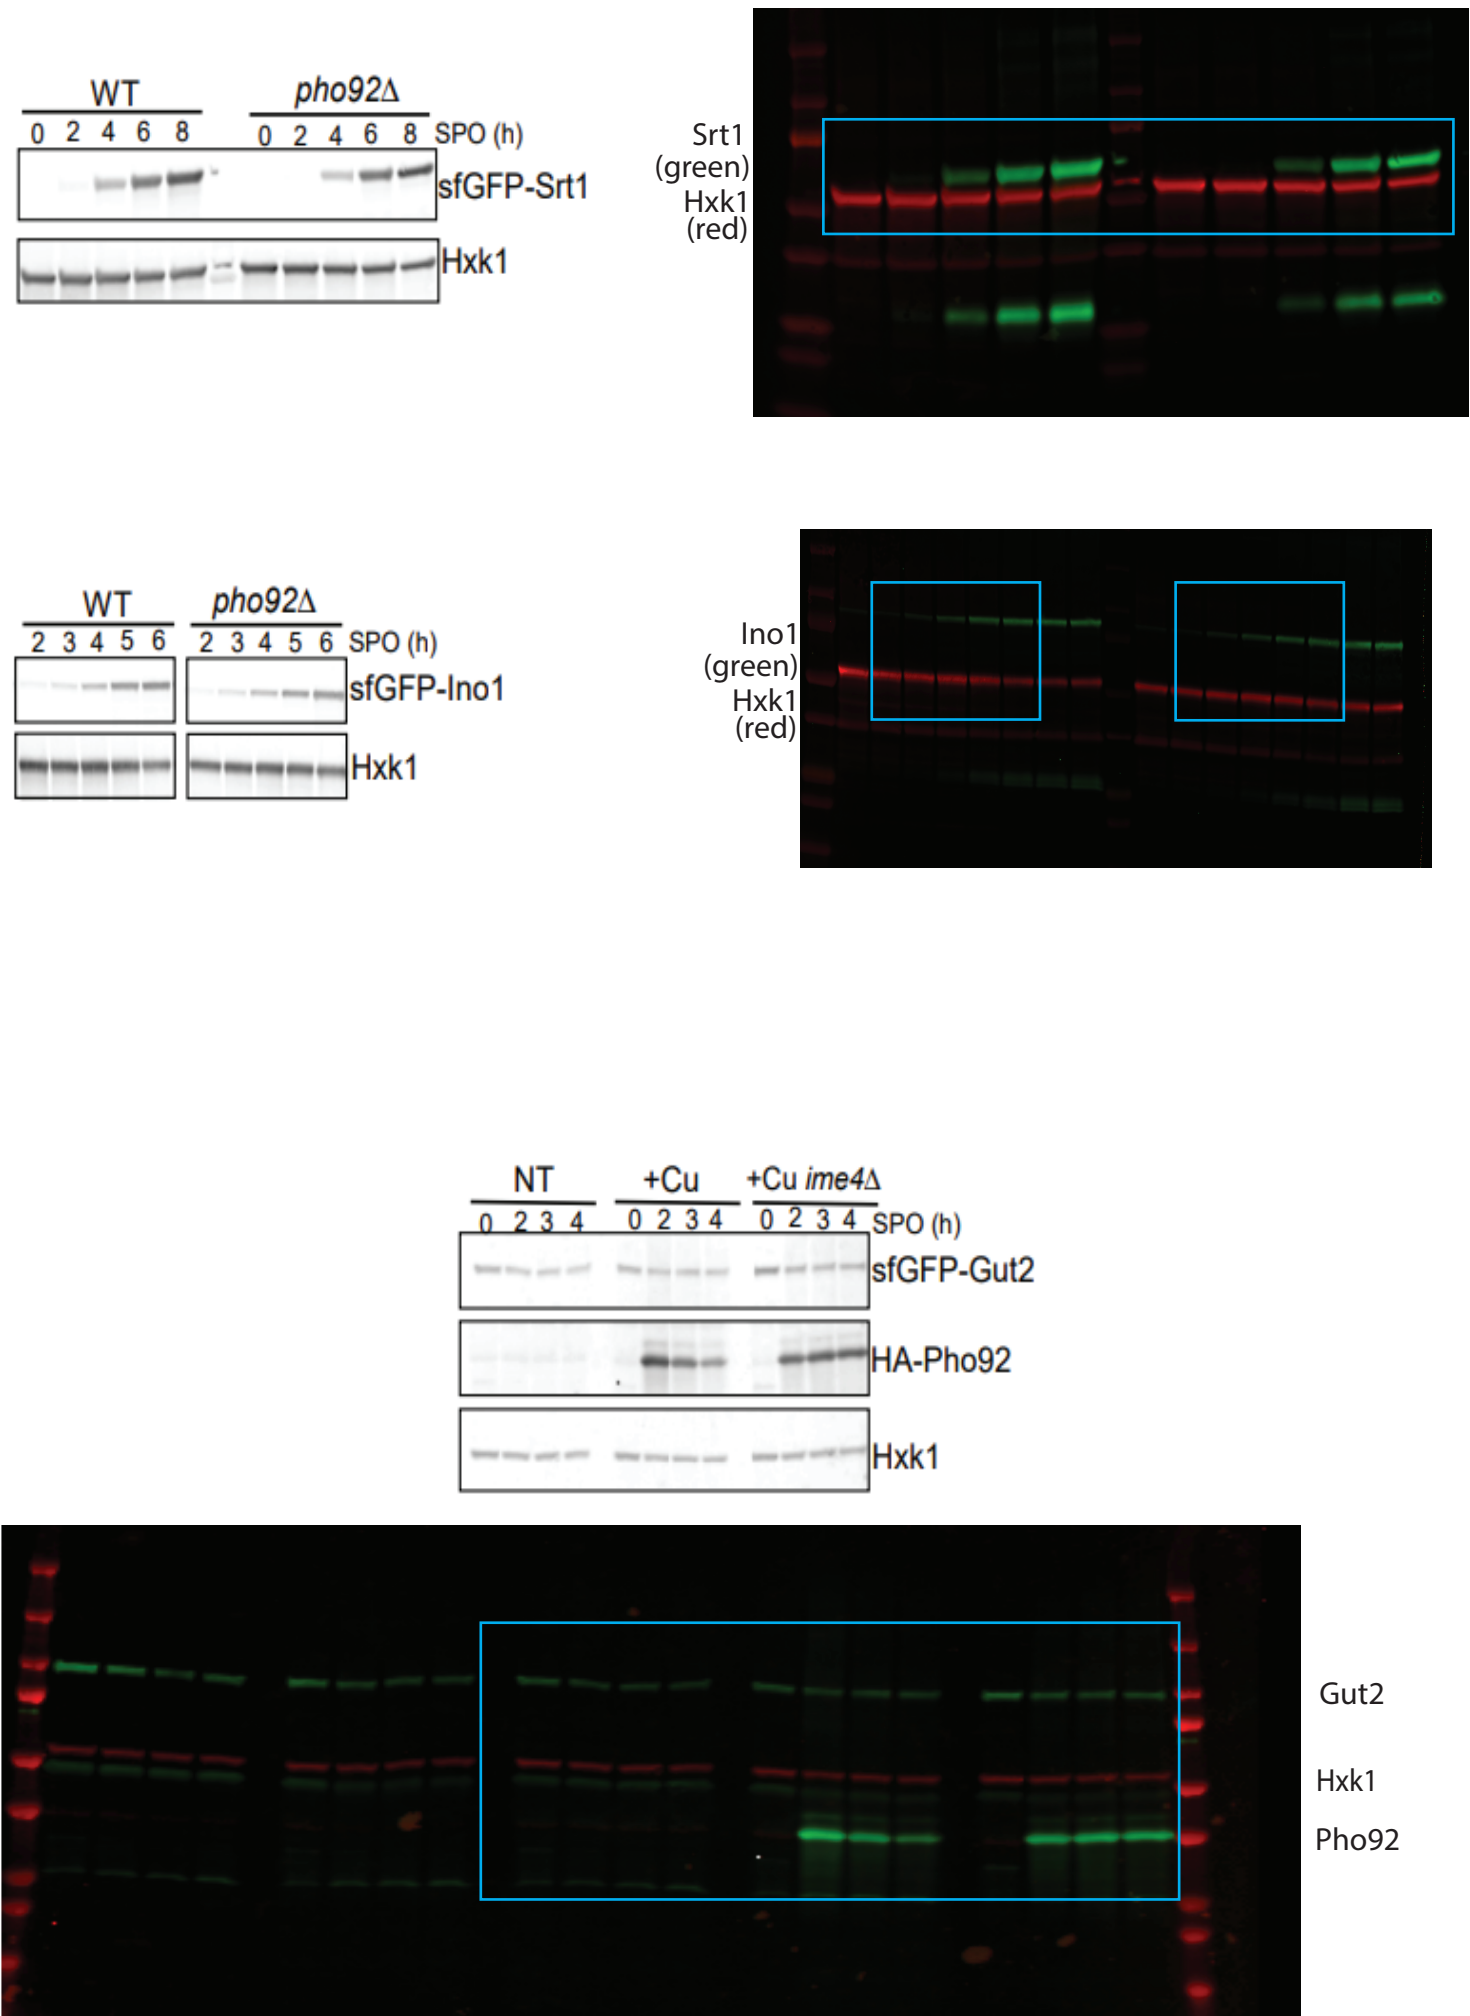

Figure 6 – figure supplement 1F

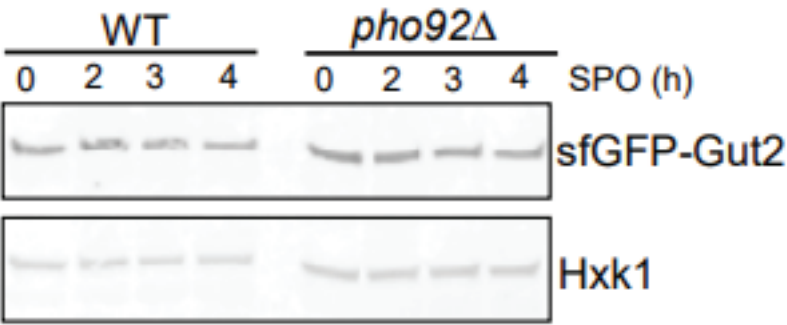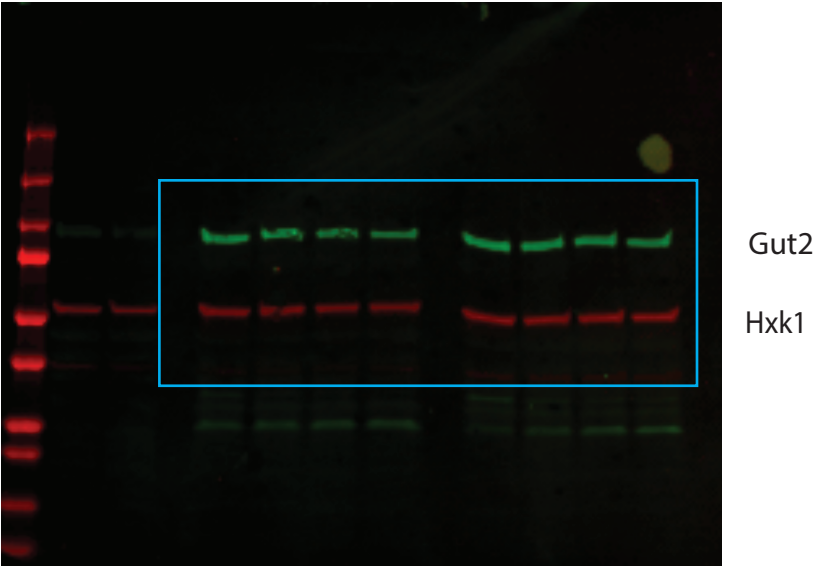

Figure 6 – figure supplement 1G

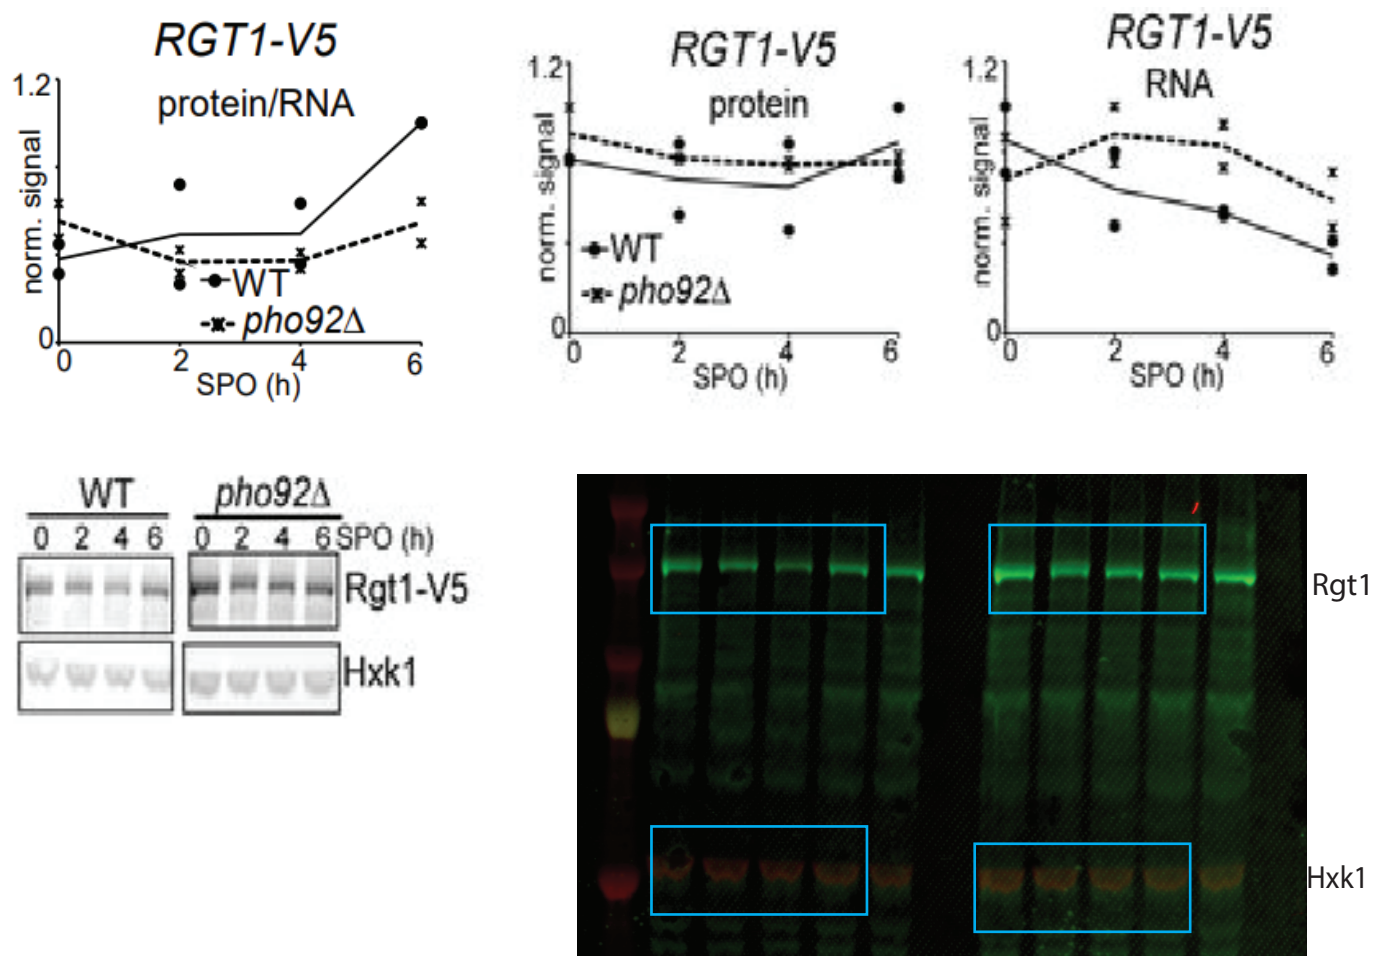



Figure 6 – figure supplement 1H

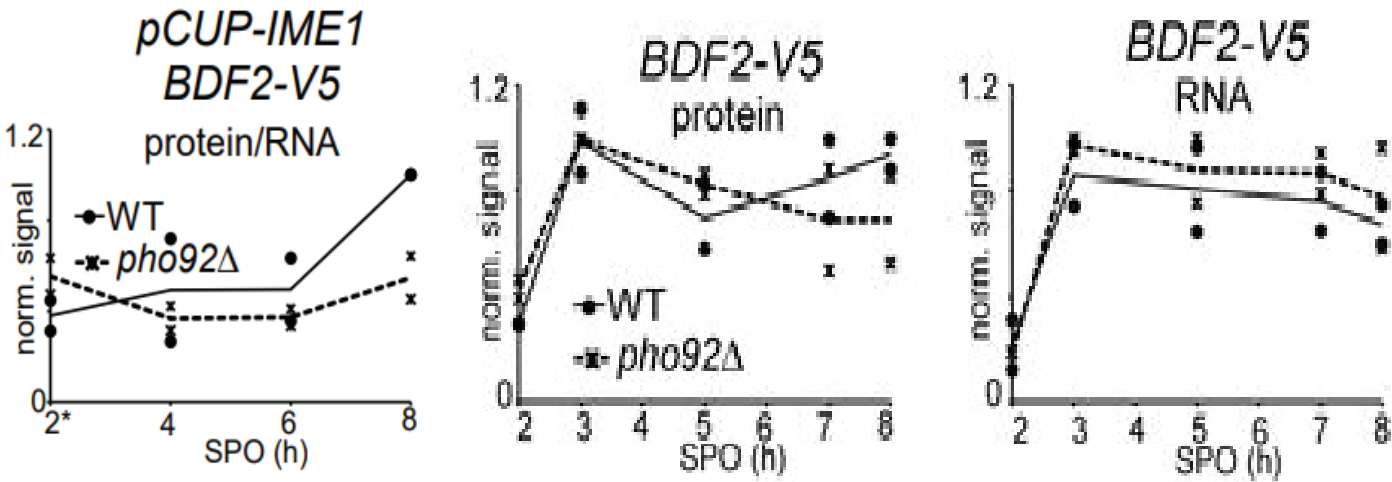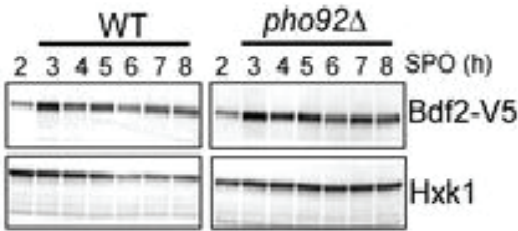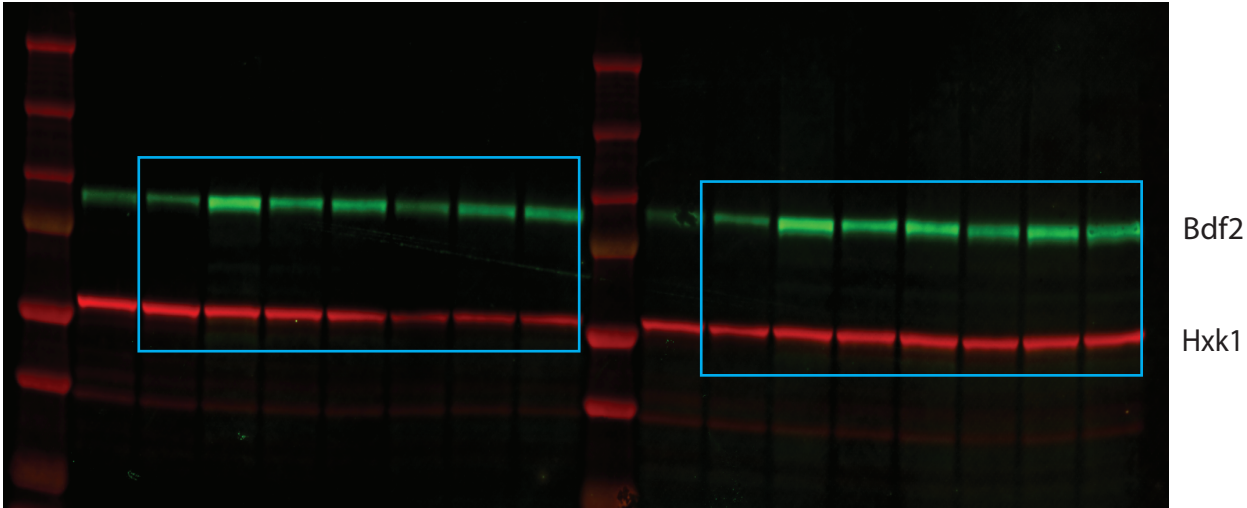

Supplement: fig6-figsupp1-data2 [file elife-84034-fig6-figsupp1-data2-v3.zip]
