# Supplementary figures and images for: N6-methyladenosine (m6A) reader Pho92 is recruited co-transcriptionally and couples translation to mRNA decay to promote meiotic fitness in yeast
Source: eLife journal article supplement (doi:10.7554/elife.84034), 2022-11-24

Hxk1  
(red)

Pho92  
(green)

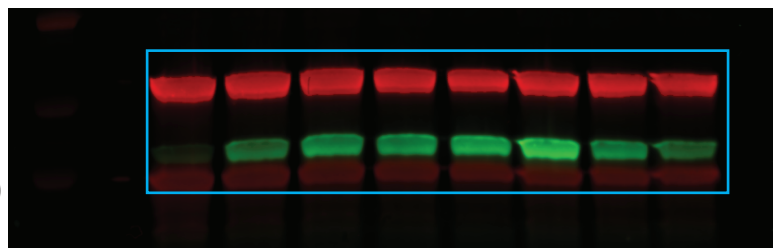

Supplement: fig1-data1 [file elife-84034-fig1-data1-v3.zip]

Hxk1  
(red)  
Pho92  
(green)

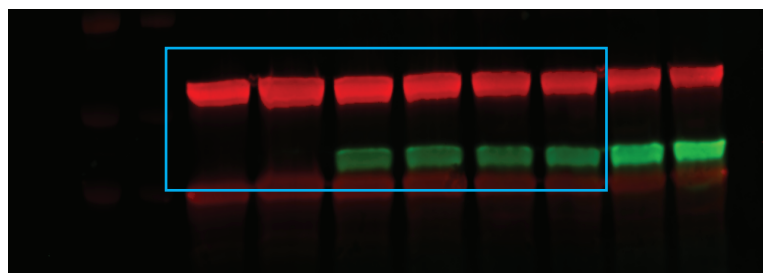

Supplement: fig1-data2 [file elife-84034-fig1-data2-v3.zip]

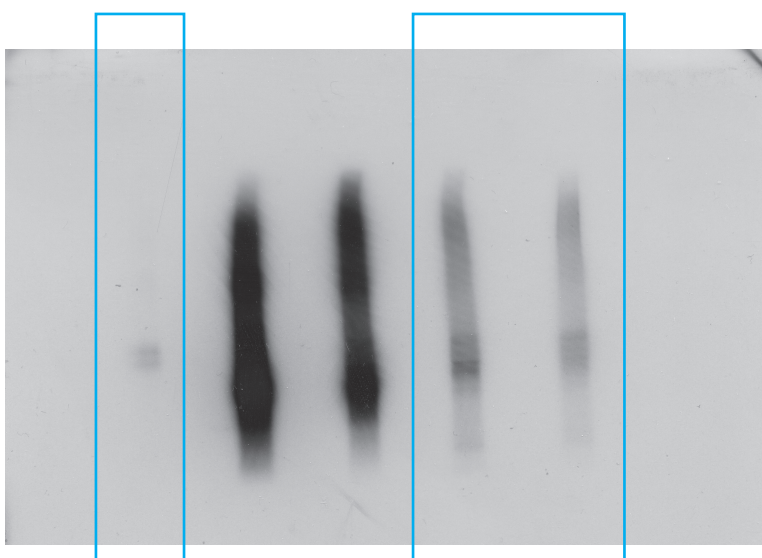

Supplement: fig1-data3 [file elife-84034-fig1-data3-v3.zip]

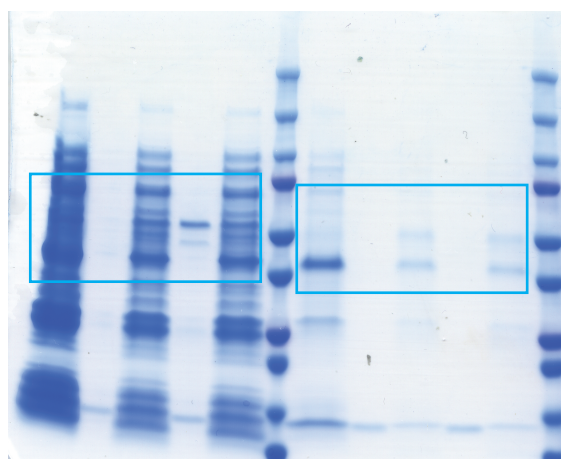

Supplement: fig1-figsupp1-data1 [file elife-84034-fig1-figsupp1-data1-v3.zip]

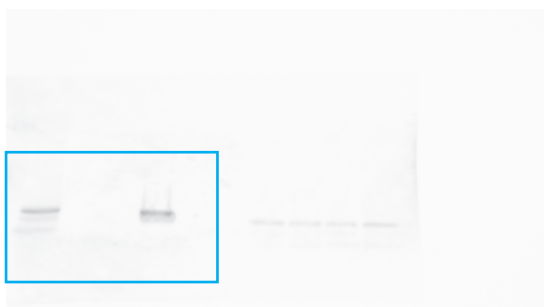

Supplement: fig1-figsupp1-data2 [file elife-84034-fig1-figsupp1-data2-v3.zip]

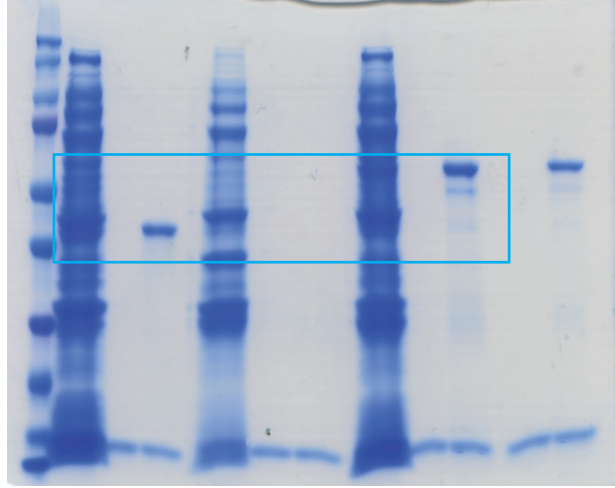

Supplement: fig1-figsupp1-data3 [file Figure 1 - figure supplement 1 - source data 3.pdf › Figure 1 - figure supplement 1 - source data 3.pdf]

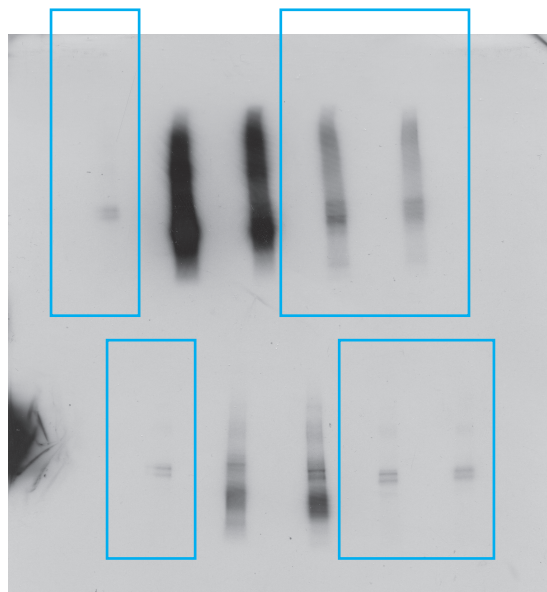

Supplement: fig1-figsupp1-data4 [file elife-84034-fig1-figsupp1-data4-v3.zip]

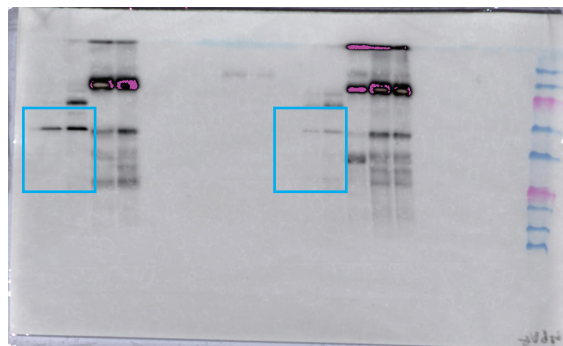

Supplement: fig1-figsupp1-data5 [file elife-84034-fig1-figsupp1-data5-v3.zip]

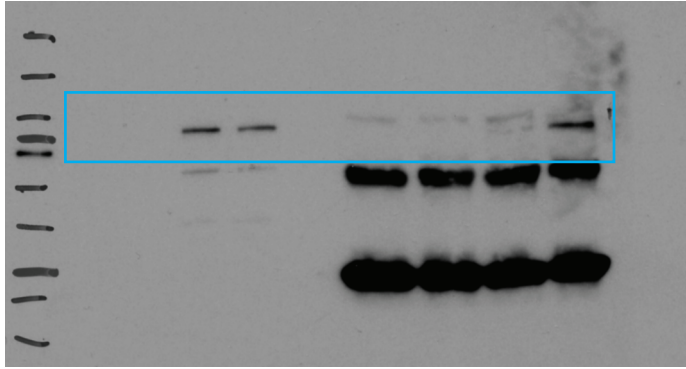

Supplement: fig4-data1 [file elife-84034-fig4-data1-v3.zip]

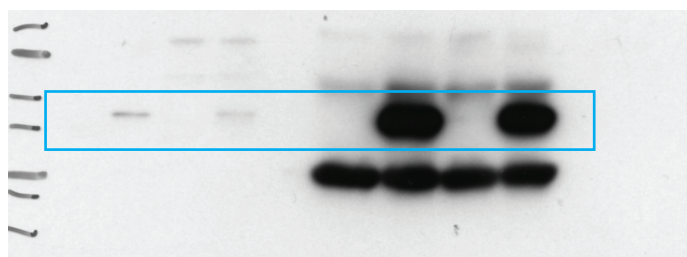

Supplement: fig4-data2 [file elife-84034-fig4-data2-v3.zip]

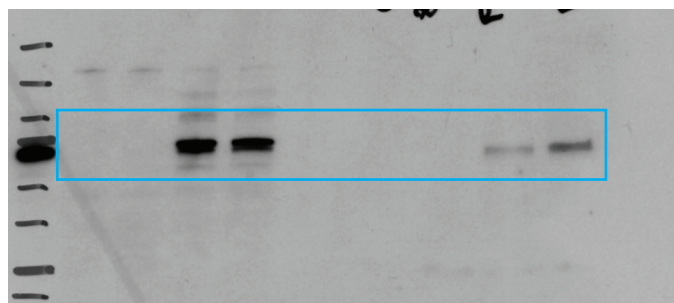

Supplement: fig4-data3 [file elife-84034-fig4-data3-v3.zip]

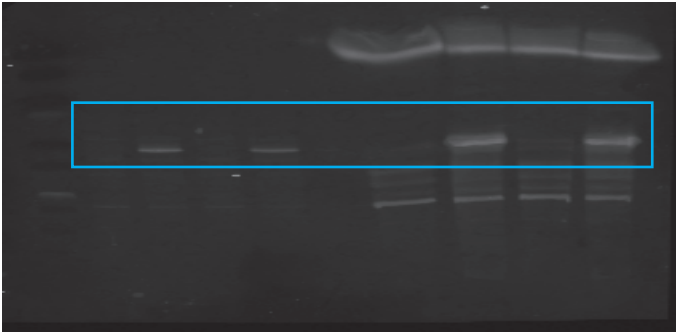

Supplement: fig4-data4 [file elife-84034-fig4-data4-v3.zip]

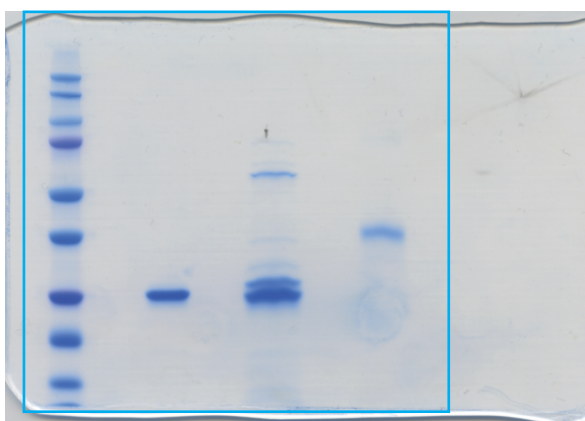

Supplement: fig4-data6 [file Figure 4 - source data 6.pdf › Figure 4 - source data 6.pdf]

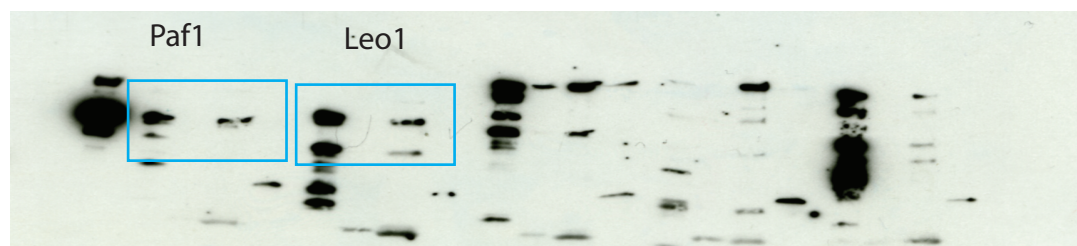

Supplement: fig4-data7 [file Figure 4 - source data 7.pdf › Figure 4 - source data 7.pdf]

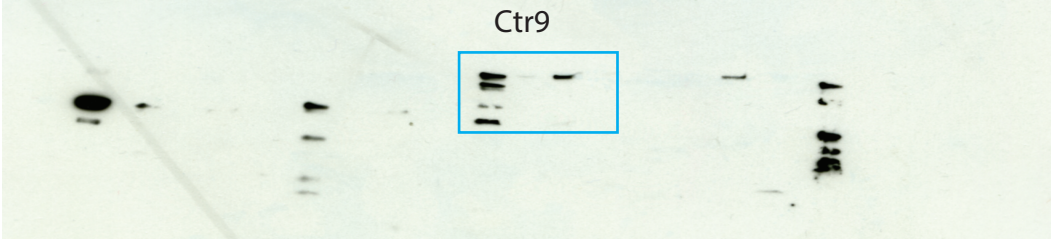

Supplement: fig4-data8 [file elife-84034-fig4-data8-v3.zip]

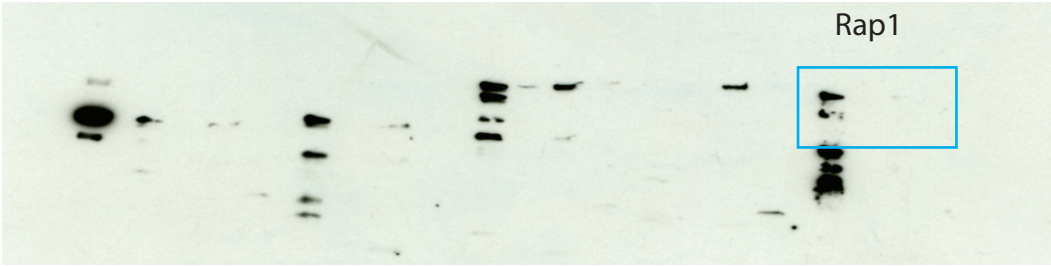

Supplement: fig4-data9 [file Figure 4 - source data 9.pdf › Figure 4 - source data 9.pdf]

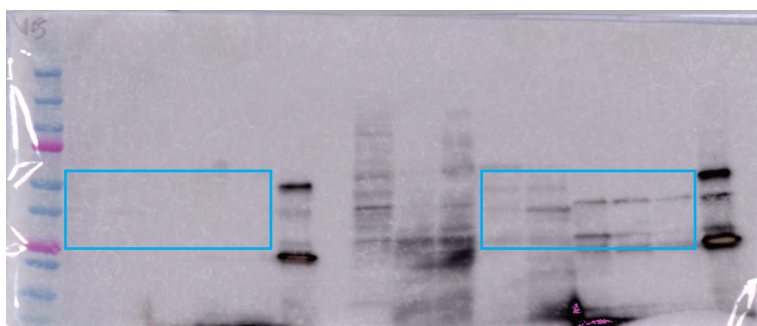

Supplement: fig4-figsupp1-data1 [file elife-84034-fig4-figsupp1-data1-v3.zip]

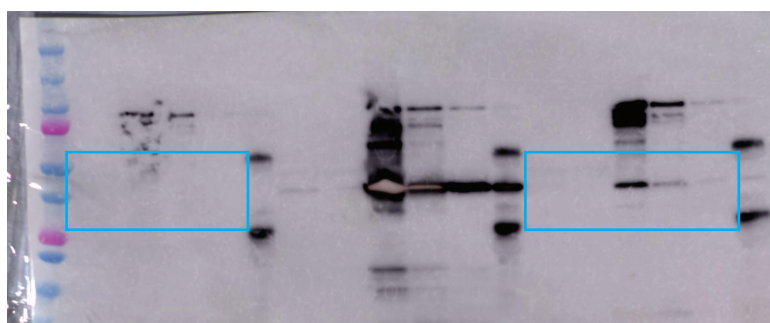

Supplement: fig4-figsupp1-data2 [file elife-84034-fig4-figsupp1-data2-v3.zip]

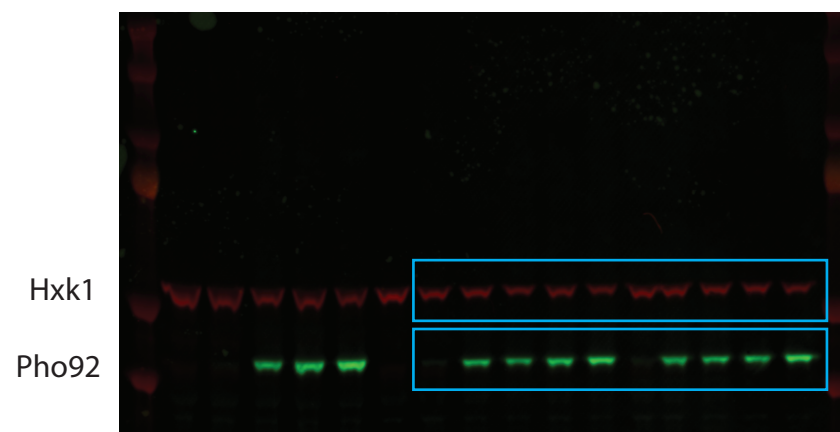

Supplement: fig4-figsupp3-data1 [file elife-84034-fig4-figsupp3-data1-v3.zip]

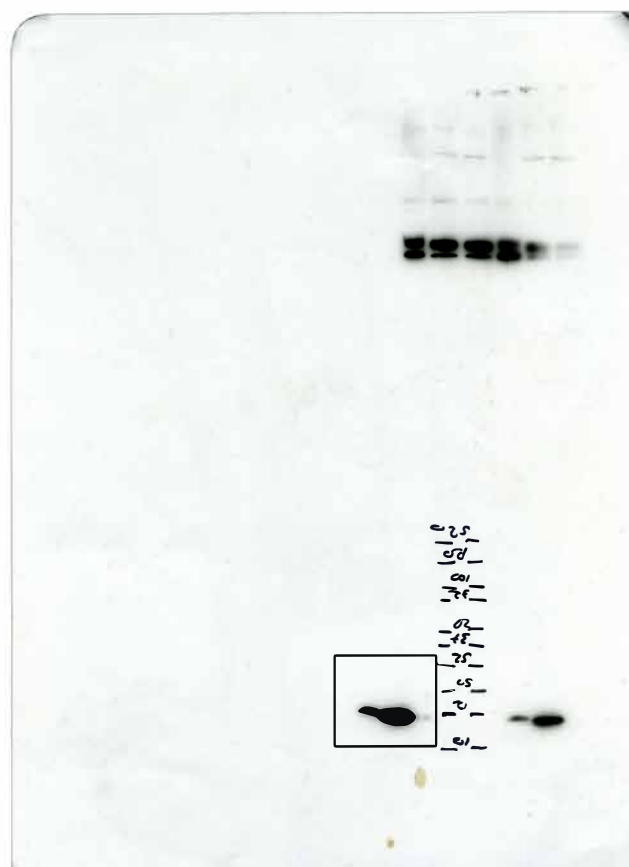

Supplement: fig6-data2 [file elife-84034-fig6-data2-v3.zip]

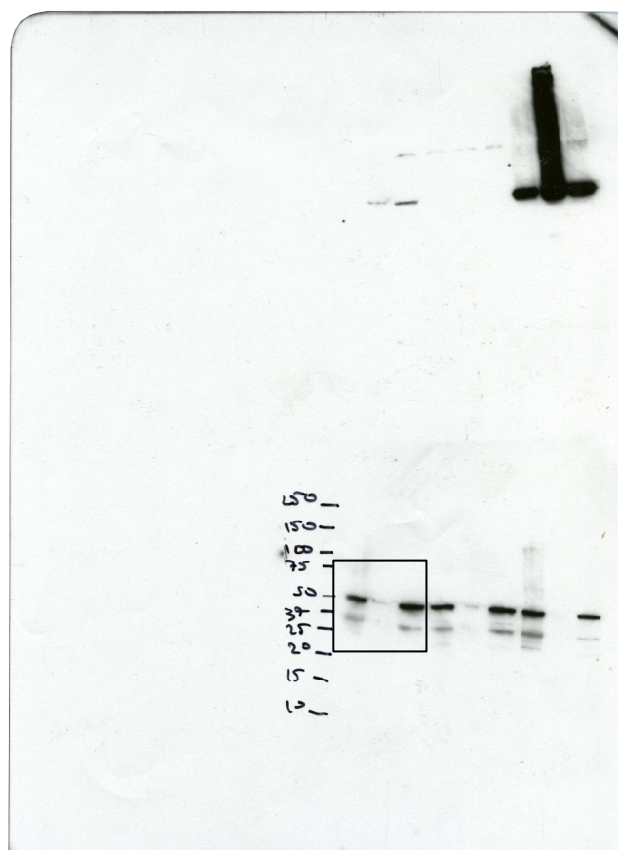

Supplement: fig6-data3 [file Figure 6 - source data 3.pdf › Figure 6 - source data 3.pdf]

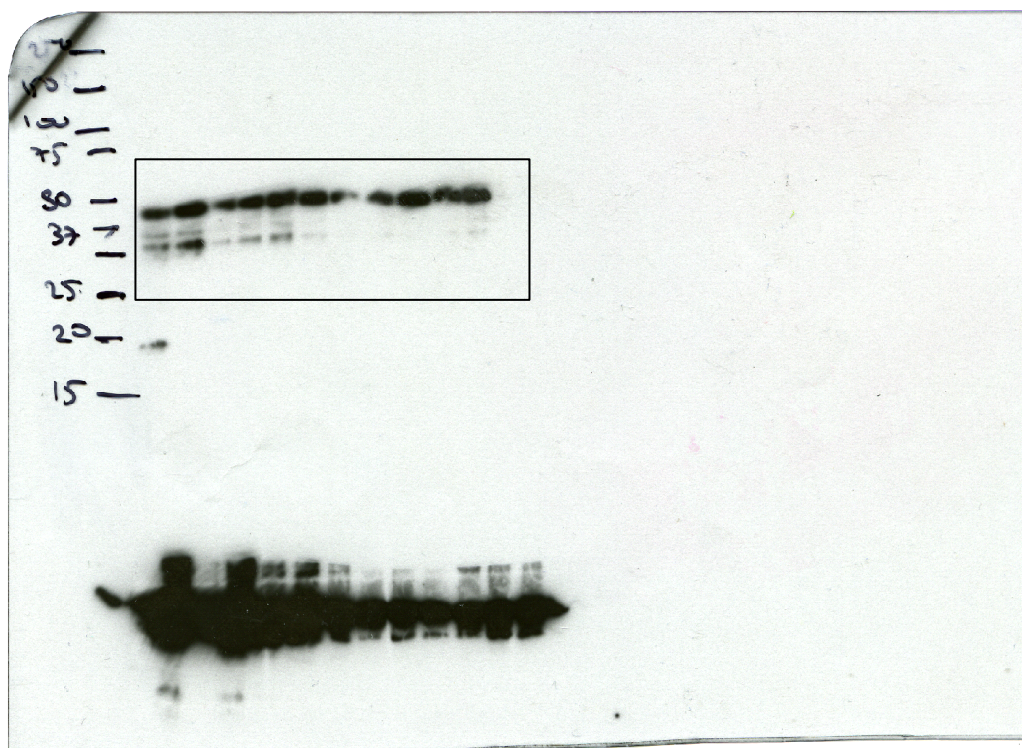

Supplement: fig6-data4 [file elife-84034-fig6-data4-v3.zip]

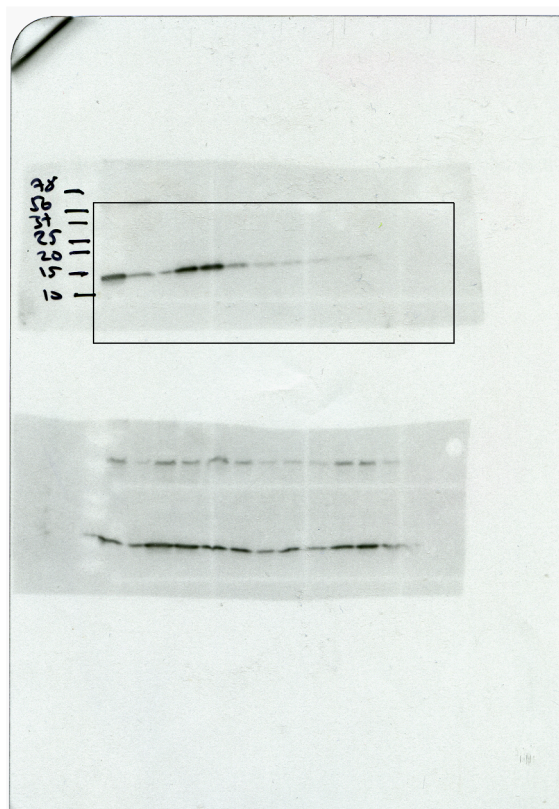

Supplement: fig6-data5 [file Figure 6 - source data 5.pdf › Figure 6 - source data 5.pdf]

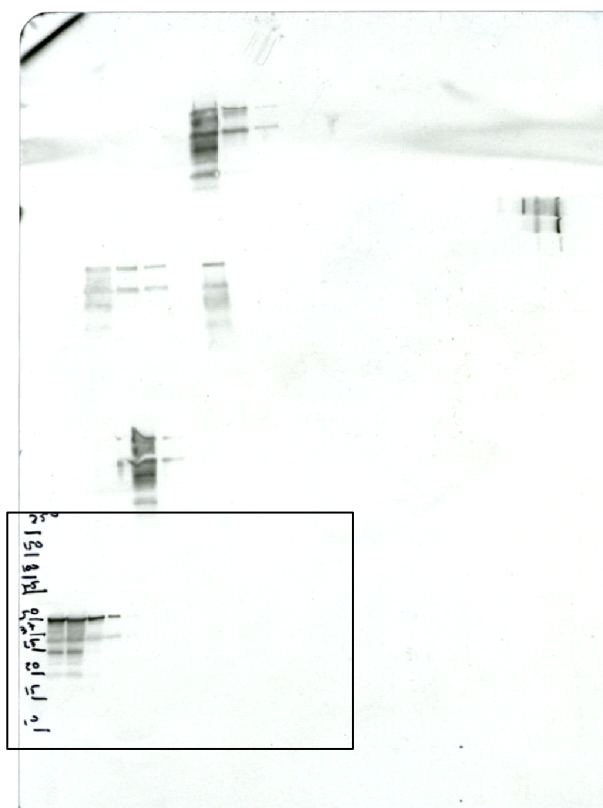

Supplement: fig6-data6 [file elife-84034-fig6-data6-v3.zip]

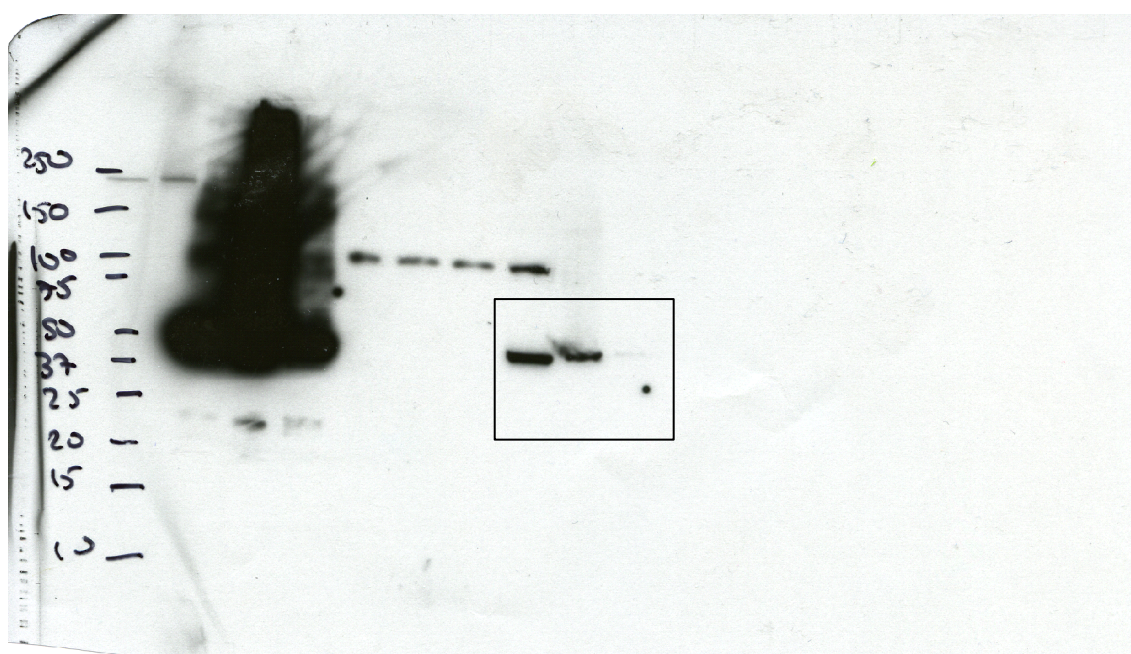

Supplement: fig6-figsupp1-data1 [file elife-84034-fig6-figsupp1-data1-v3.zip]

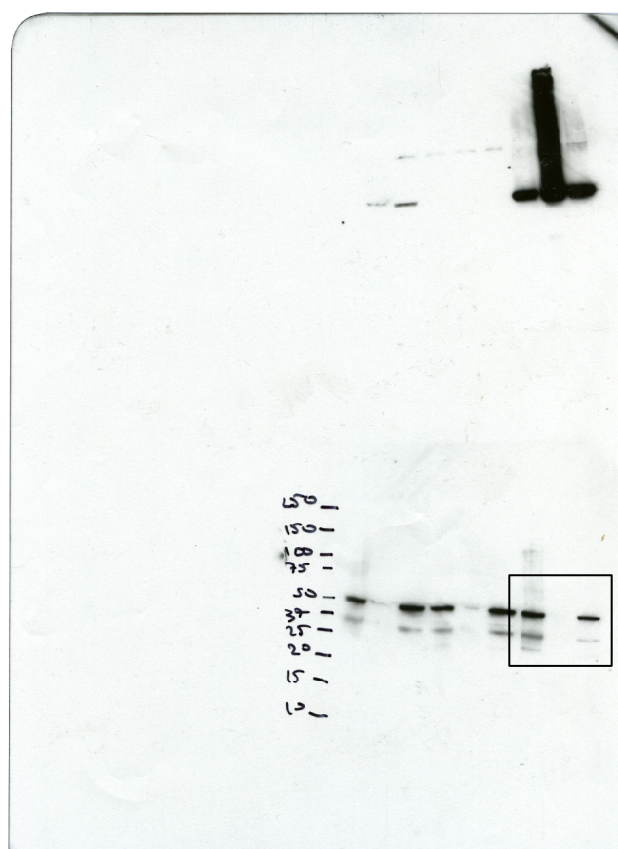

Supplement: fig6-figsupp1-data3 [file elife-84034-fig6-figsupp1-data3-v3.zip]

Srt1  
(green)  
Hxk1  
(red)

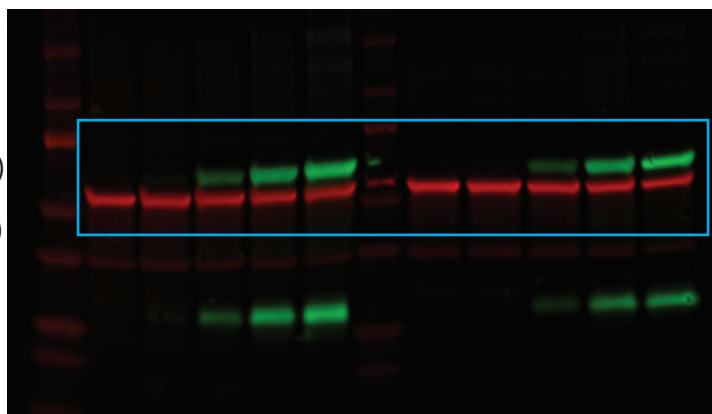

Supplement: fig6-figsupp1-data4 [file elife-84034-fig6-figsupp1-data4-v3.zip]

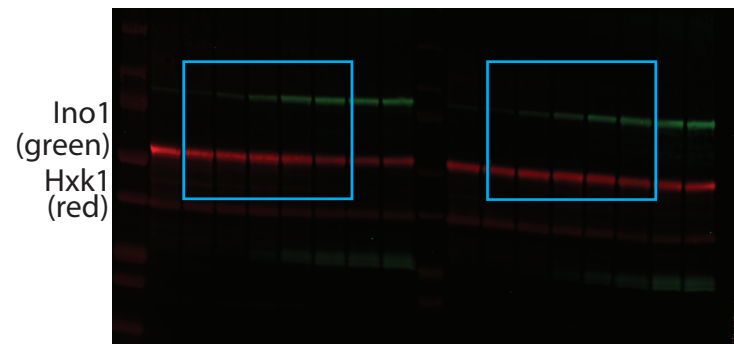

Supplement: fig6-figsupp1-data5 [file elife-84034-fig6-figsupp1-data5-v3.zip]

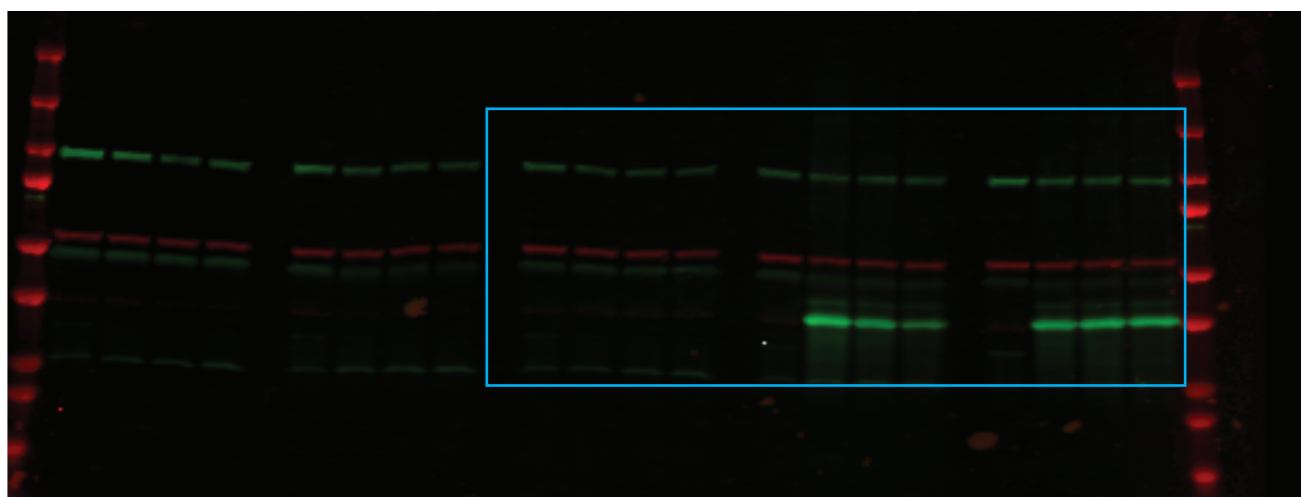

Gut2

Hxk1

Pho92

Supplement: fig6-figsupp1-data6 [file elife-84034-fig6-figsupp1-data6-v3.zip]

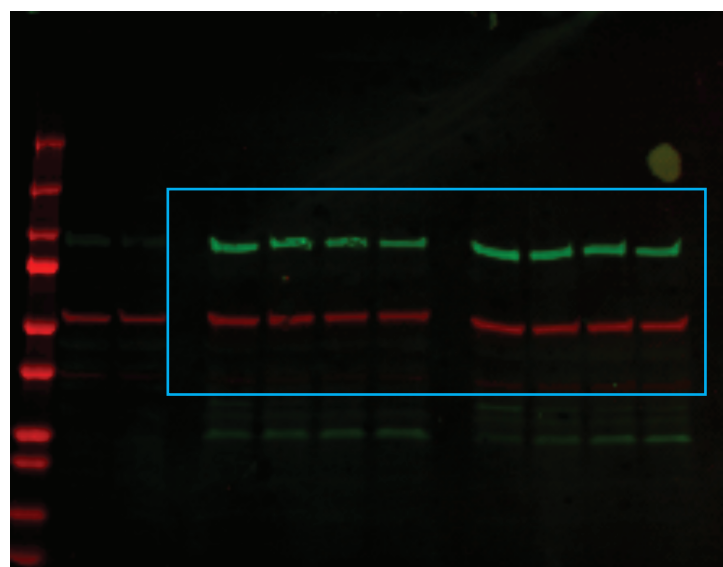

Gut2

Hxk1

Supplement: fig6-figsupp1-data7 [file Figure 6 - figure supplement 1 - source data 7.pdf › Figure 6 - figure supplement 1 - source data 7.pdf]

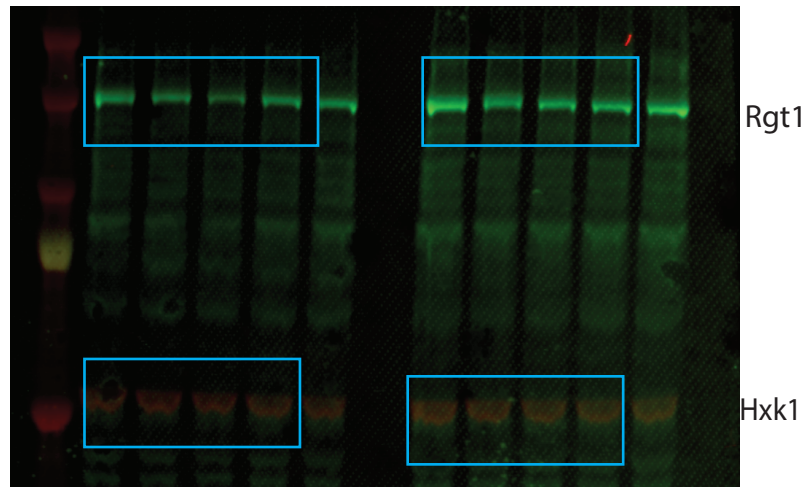

Supplement: fig6-figsupp1-data8 [file elife-84034-fig6-figsupp1-data8-v3.zip]

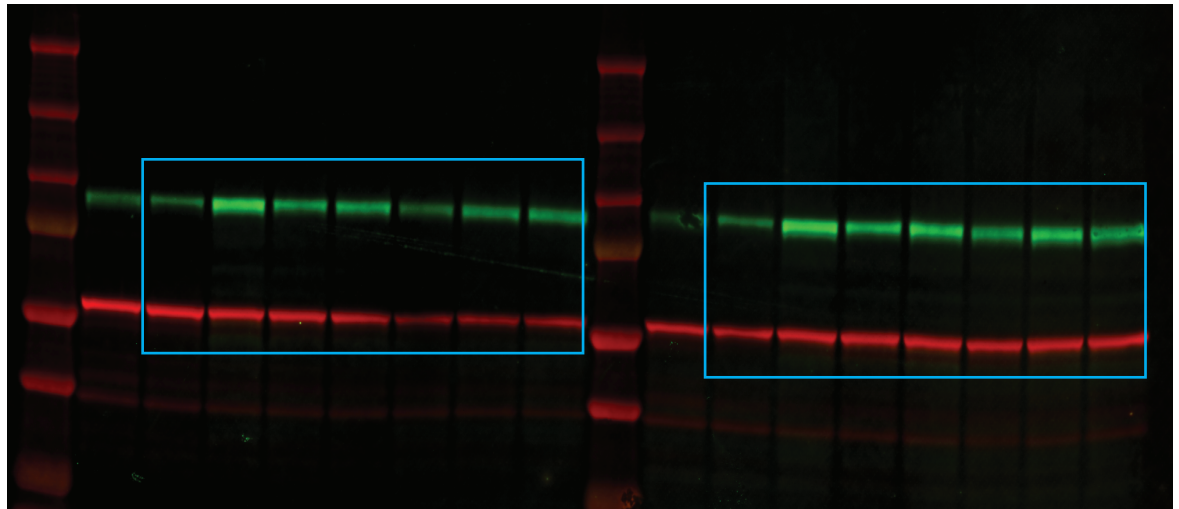

Bdf2

Hxk1

Supplement: fig6-figsupp1-data9 [file elife-84034-fig6-figsupp1-data9-v3.zip]
